# Supplementary material for: Fecal Microbiota and Hair Glucocorticoid Concentration Show Associations with Growth during Early Life in a Pig Model
Source: MDPI journal article supplement (doi:10.3390/nu14214639), 2022-11-03
Supplement: s1 [file s1]

**Supplementary Table S1.** Mean body weight (BW) and average daily gain (ADG) of the animals included in each group for lactation and nursery periods. Each mean is followed by its

| Group              | Fast Fast      | Fast Slow       | Slow Fast       | Slow Slow      | DF | F value | P-value |
|--------------------|----------------|-----------------|-----------------|----------------|----|---------|---------|
| Lactation ADG, g/d | 246 ± 5.2 a    | 244 ± 4.6 a     | 148 ± 3.3 b     | 138 ± 5.9 b    | 71 | 151.4   | < 0.001 |
| Nursery ADG, g/d   | 273 ± 7.1 a    | 128 ± 3.7 c     | 238 ± 5.7 b     | 112 ± 3.5 d    | 71 | 203.5   | < 0.001 |
| Birth BW, kg       | 1.45 ± 0.026 a | 1.31 ± 0.069 ab | 1.35 ± 0.074 ab | 1.21 ± 0.056 b | 71 | 2.904   | 0.040   |
| Lactation BW, kg   | 6.7 ± 0.083 a  | 6.4 ± 0.094 a   | 4.5 ± 0.105 b   | 4.1 ± 0.112 b  | 71 | 123.6   | < 0.001 |
| Nursery BW, kg     | 17.9 ± 0.330 a | 11.7 ± 0.196 c  | 14.2 ± 0.306 b  | 8.7 ± 0.170 d  | 71 | 215.1   | < 0.001 |

Fast\_Fast: Pigs showing fast growth during lactation and nursery periods.

Fast\_Slow: Pigs showing fast growth during lactation period and slow growth during nursery period.

Slow\_Fast: Pigs showing slow growth during lactation period and fast growth during nursery period.

Slow\_Slow: Pigs showing slow growth during lactation and nursery periods.

DF: Degrees of freedom.

a,b,c,d Values with different letter in the same column are significantly different according to ANOVA and Tukey adjust.

**Supplementary Table S2.** Hair glucocorticoid concentration, alpha diversity and SCFA concentration for each sex, lactation growth group and nursery growth group.

| Item                          | Lactation growth |       |        | Nursery growth |        |        | Sex     |       |        | DF | F value          |                |                            | Sex  | P value          |                |                            |
|-------------------------------|------------------|-------|--------|----------------|--------|--------|---------|-------|--------|----|------------------|----------------|----------------------------|------|------------------|----------------|----------------------------|
|                               | Fast             | Slow  | SEM    | Fast           | Slow   | SEM    | Females | Males | SEM    |    | Lactation growth | Nursery growth | Lactation x nursery growth |      | Lactation growth | Nursery growth | Lactation x nursery growth |
| Cortisol, pg/mg               | 18.3             | 19.7  | 0.74   | 19.7           | 152.9  | 0.388  | 19.1    | 18.8  | 0.77   | 68 | 2.29             | 0.54           | 0.03                       | 0.52 | 0.130            | 0.463          | 0.852                      |
| Cortisone, pg/mg              | 140              | 109.6 | 22.3   | 18.200         | 98.900 | 0.6020 | 135     | 118   | 22.8   | 53 | 0.95             | 4.18           | 1.85                       | 0.47 | 0.329            | 0.041          | 0.174                      |
| Cortisol/cortisone            | 0.40             | 0.62  | 0.115  | 0.74           | 23.40  | 0.110  | 0.48    | 0.51  | 0.112  | 53 | 1.46             | 3.30           | 2.00                       | 0.40 | 0.227            | 0.069          | 0.157                      |
| Observed OTUs                 | 354              | 343   | 14.9   | 353            | 345    | 15.1   | 346     | 352   | 15.2   | 64 | 0.95             | 0.00           | 0.40                       | 1.26 | 0.330            | 0.969          | 0.526                      |
| Eveness                       | 0.786            | 0.781 | 0.0078 | 0.797          | 0.770  | 0.0074 | 0.778   | 0.790 | 0.0075 | 64 | 0.33             | 5.79           | 0.00                       | 0.97 | 0.604            | 0.018          | 0.959                      |
| Shannon                       | 6.63             | 6.55  | 0.109  | 6.72           | 6.46   | 0.105  | 6.55    | 6.64  | 0.107  | 64 | 0.76             | 2.32           | 0.01                       | 0.69 | 0.411            | 0.137          | 0.929                      |
| Total SCFA, $\mu\text{mol/g}$ | 84.02            | 75.54 | 2.970  | 79.68          | 80.35  | 2.930  | 80.2    | 79.8  | 2.98   | 63 | 4.63             | 0.03           | 1.03                       | 0.00 | 0.031            | 0.864          | 0.310                      |
| Acetate, $\mu\text{mol/g}$    | 47.33            | 42.39 | 1.848  | 43.56          | 46.17  | 1.823  | 45.5    | 44.5  | 1.86   | 63 | 3.85             | 0.95           | 1.43                       | 0.07 | 0.049            | 0.331          | 0.231                      |
| Butyrate, $\mu\text{mol/g}$   | 10.20            | 8.05  | 0.589  | 9.67           | 8.58   | 0.581  | 9.0     | 9.3   | 0.60   | 63 | 7.53             | 5.86           | 0.00                       | 0.14 | 0.006            | 0.017          | 0.964                      |

DF: Degrees of freedom of the statistical test.
